# Supplementary material
Source: PubMed Central journal article supplement (PMC8113064)
Supplement: NIHMS1655953-supplement-Supplemental_File.pdf [file NIHMS1655953-supplement-Supplemental_File.pdf]

## Resource Guide – Web Resources

| Topic                           | Resources                   | Link/information                                                                                                                                                                                                                                                                                                                                                                                                                                                                                                                          |
|---------------------------------|-----------------------------|-------------------------------------------------------------------------------------------------------------------------------------------------------------------------------------------------------------------------------------------------------------------------------------------------------------------------------------------------------------------------------------------------------------------------------------------------------------------------------------------------------------------------------------------|
| <b>Sexual Health</b>            | Breast Cancer.org           | Sex and Intimacy:<br><a href="http://www.breastcancer.org/tips/intimacy">http://www.breastcancer.org/tips/intimacy</a>                                                                                                                                                                                                                                                                                                                                                                                                                    |
|                                 | Cancer.gov                  | Cancer with Spouse/ Partner:<br><a href="https://www.cancer.gov/about-cancer/coping/adjusting-to-cancer/spouse-or-partner">https://www.cancer.gov/about-cancer/coping/adjusting-to-cancer/spouse-or-partner</a>                                                                                                                                                                                                                                                                                                                           |
|                                 | Cancer.net                  | Dating and Intimacy:<br><a href="https://www.cancer.net/navigating-cancer-care/dating-sex-and-reproduction/dating-and-intimacy">https://www.cancer.net/navigating-cancer-care/dating-sex-and-reproduction/dating-and-intimacy</a><br><br>Sexual health and Cancer Treatment-Women:<br><a href="https://www.cancer.net/navigating-cancer-care/dating-sex-and-reproduction/sexual-health-and-cancer-treatment-women">https://www.cancer.net/navigating-cancer-care/dating-sex-and-reproduction/sexual-health-and-cancer-treatment-women</a> |
|                                 | Cancer. org                 | Sex and the Adult Female With Cancer:<br><a href="https://www.cancer.org/treatment/treatments-and-side-effects/physical-side-effects/fertility-and-sexual-side-effects/sexuality-for-women-with-cancer.html">https://www.cancer.org/treatment/treatments-and-side-effects/physical-side-effects/fertility-and-sexual-side-effects/sexuality-for-women-with-cancer.html</a>                                                                                                                                                                |
|                                 | Living Beyond Breast Cancer | Sexual side effects:<br><a href="http://www.lbbc.org/learn/side-effects/sexual-side-effects">http://www.lbbc.org/learn/side-effects/sexual-side-effects</a>                                                                                                                                                                                                                                                                                                                                                                               |
|                                 | Susan G. Komen              | Sexuality and Intimacy:<br><a href="https://ww5.komen.org/BreastCancer/SexandSexuality.html">https://ww5.komen.org/BreastCancer/SexandSexuality.html</a>                                                                                                                                                                                                                                                                                                                                                                                  |
| <b>Sexual Health/Body Image</b> | Cancer.gov                  | Self-Image and Sexuality:<br><a href="https://www.cancer.gov/about-cancer/coping/self-image">https://www.cancer.gov/about-cancer/coping/self-image</a>                                                                                                                                                                                                                                                                                                                                                                                    |
| <b>Body Image</b>               | Cancer.org                  | Body Image and Sexuality After Breast Cancer:<br><a href="https://www.cancer.org/cancer/breast-cancer/living-as-a-breast-cancer-survivor/body-image-and-sexuality-after-breast-cancer.html">https://www.cancer.org/cancer/breast-cancer/living-as-a-breast-cancer-survivor/body-image-and-sexuality-after-breast-cancer.html</a>                                                                                                                                                                                                          |
|                                 | Lookgoodfeel better.org     | Beauty Guide:<br><a href="http://lookgoodfeelbetter.org/programs/beauty-guide/">http://lookgoodfeelbetter.org/programs/beauty-guide/</a>                                                                                                                                                                                                                                                                                                                                                                                                  |
| <b>Menopausal Health</b>        | Breast Cancer.org           | Managing Menopausal Symptoms:<br><a href="http://www.breastcancer.org/tips/menopausal">http://www.breastcancer.org/tips/menopausal</a><br><br>Vaginal Dryness:<br><a href="http://www.breastcancer.org/tips/menopausal/treat/vaginal-changes/dryness">http://www.breastcancer.org/tips/menopausal/treat/vaginal-changes/dryness</a><br><br>Vaginal Infections:<br><a href="http://www.breastcancer.org/tips/menopausal/treat/vaginal-changes/infections">http://www.breastcancer.org/tips/menopausal/treat/vaginal-changes/infections</a> |
|                                 | Living Beyond Breast Cancer | Menopausal Symptoms:<br><a href="http://www.lbbc.org/learn/side-effects/menopausal-symptoms">http://www.lbbc.org/learn/side-effects/menopausal-symptoms</a>                                                                                                                                                                                                                                                                                                                                                                               |
|                                 | Susan G. Komen              | Treating Menopausal Symptoms:<br><a href="https://ww5.komen.org/BreastCancer/AlternativestoPostmenopausalHormones.html">https://ww5.komen.org/BreastCancer/AlternativestoPostmenopausalHormones.html</a>                                                                                                                                                                                                                                                                                                                                  |

## Resource Guide – Fox Chase Cancer Center Resources

| Resource                                            | Summary of Content                                                                                                                                                                            | Contact Information                                                                                                                                                                                                                                                                                   |
|-----------------------------------------------------|-----------------------------------------------------------------------------------------------------------------------------------------------------------------------------------------------|-------------------------------------------------------------------------------------------------------------------------------------------------------------------------------------------------------------------------------------------------------------------------------------------------------|
| <b>Women’s Menopausal and Sexual Health Program</b> | Provides clinical support for issues such as fertility and sexuality as well as menopausal changes; includes gynecologic examination and assessment; referrals can be made to therapists.     | Call 888-FOX-CHASE (888-369-2427) to make an appointment:<br><br><a href="https://www.foxchase.org/womens-menopausal-and-sexual-health-program">https://www.foxchase.org/womens-menopausal-and-sexual-health-program</a>                                                                              |
| <b>Boo’s Boutique</b>                               | Helps breast cancer patients through offering breast prosthetics, bra fittings, wigs, clothing, skincare products, etc; Located on the first floor of Young Pavilion (across from gift shop). | Call 215-728-2627 to make an appointment:<br><br><a href="https://www.foxchase.org/support/managing-your-care-and-side-effects/boos-boutique">https://www.foxchase.org/support/managing-your-care-and-side-effects/boos-boutique</a>                                                                  |
| <b>Cancer Fatigue Program</b>                       | A 12 week program to help with fatigue using both exercise and mindfulness. The program also includes advice on diet and lifestyle that can assist with improving fatigue.                    | Call 215-728-2592 to register:<br><br><a href="https://www.foxchase.org/support/managing-your-care-and-side-effects/physical-medicine-and-rehabilitation/cancer-fatigue">https://www.foxchase.org/support/managing-your-care-and-side-effects/physical-medicine-and-rehabilitation/cancer-fatigue</a> |
| <b>Pain and Palliative Care</b>                     | Helps manage pain from cancer, provides support to patients and families; generally, you can ask your cancer provider for a referral.                                                         | Call 888-FOX-CHASE patient or family member must talk to provider to request consultation:<br><br><a href="https://www.foxchase.org/support/managing-your-care-and-side-effects/pain-palliative-care">https://www.foxchase.org/support/managing-your-care-and-side-effects/pain-palliative-care</a>   |
| <b>Lymphedema Support Group</b>                     | A support group with informational topics and expert speakers/educational programs; call to find out information and to register.                                                             | Call 215-728-2592 to register:<br><br><a href="https://www.foxchase.org/lymphedema-support-group">https://www.foxchase.org/lymphedema-support-group</a>                                                                                                                                               |
